# Supplementary material for: Reaction of Np, Am, and Cm ions with CO2 and O2 in a reaction cell in triple quadrupole inductively coupled plasma mass spectrometry
Source: Royal Society of Chemistry journal article supplement (doi:10.1039/d3ja00136a), 2023-01-01
Supplement: d3ja00136a1.pdf [file d3ja00136a1.pdf]

## Supporting Information

### Reaction of Np, Am, and Cm Ions with CO<sub>2</sub> and O<sub>2</sub> in Reaction Cell in Triple Quadrupole Inductively Coupled Plasma Mass Spectrometry

Hiroyuki Kazama,<sup>\*a,b</sup> Kenji Konashi,<sup>c</sup> Tatsuya Suzuki,<sup>d</sup> Shin-ichi Koyama,<sup>a</sup> Koji Maeda,<sup>b</sup> Yoshihiro Sekio,<sup>b</sup> Takashi Ohnishi,<sup>b</sup> Chikage Abe,<sup>c</sup> Yasuyuki Shikamori,<sup>c</sup> and Yasuyoshi Nagai<sup>c</sup>

<sup>a</sup>Collaborative Laboratories for Advanced Decommissioning Science (CLADS), Japan Atomic Energy Agency, 790-1 Otsuka, Motooka, Tomioka, Fukushima 979-1195, Japan

<sup>b</sup>Oarai Research and Development Institute, Japan Atomic Energy Agency, 4002 Narita, Oarai-machi, Ibaraki 311-1393, Japan

<sup>c</sup>Department of Nuclear System Safety Engineering, Nagaoka University of Technology, 1603-1, Kamitomioka, Nagaoka, Niigata 940-2188, Japan

<sup>d</sup>Institute for Materials Research, Tohoku University, 2145-2, Narita-cho, Oarai-machi, Higashiibaraki-gun, Ibaraki 311-1313, Japan

Table S1. ICP-MS/MS instrument settings for the measurement of Np, Am, and Cm with CO<sub>2</sub> and O<sub>2</sub>

| Conditions | Parameter                    | Value      |
|------------|------------------------------|------------|
| ICP        | RF Power                     | 1550 W     |
|            | RF Matching                  | 1.70 V     |
|            | Sampling Depth               | 8.0 mm     |
|            | Carries Gas                  | 1.01 L/min |
|            | Temperature of Spray Chamber | 2 °C       |
|            | Makeup Gas                   | 0.00 L/min |
| Lens       | Extraction Lens 1            | -5 V       |
|            | Extraction Lens 2            | -250 V     |
|            | Omega Bias                   | -150 V     |
|            | Omega Lens                   | 10 V       |
|            | CRC focus                    | 0 V        |
|            | CRC Entrance                 | -50 V      |
|            | CRC Exit                     | -60 V      |
|            | Q1 Entrance                  | -50 V      |
|            | Q1 Exit                      | 0 V        |
|            | Deflect                      | 5 V        |
|            | Plate Bias                   | -60 V      |
| Q1         | Q1 Bias                      | 0 V        |
|            | Q1 Prefilter Bias            | -10 V      |
|            | Q1 Postfilter Bias           | -10 V      |
| CRC        | Octopole Bias                | -3 V       |
|            | Axial acceleration           | 1.5 V      |
|            | Octopole RF                  | 180 V      |
|            | Energy Discrimination        | -7 V       |

The sample solution was introduced using a peristaltic pump. A Micromist nebulizer, a quartz splay chamber, a Ni sampler cone, and a Ni skimmer cone with x-lends were used for all measurements.
